# Supplementary material
Source: PubMed Central journal article supplement (PMC4542435)
Supplement: supp_db15-0116_DB150116SupplementaryData.pdf [file supp_db15-0116_DB150116SupplementaryData.pdf]

## SUPPLEMENTARY DATA

### **Circulating TGF- $\beta$ 1-regulated miRNAs and the risk of rapid progression to ESRD in type 1 diabetes**

Marcus G. Pezzolesi PhD, MPH<sup>1,2</sup>, Eiichiro Satake MD, PhD<sup>1,2</sup>, Kevin P. McDonnell BS<sup>1</sup>, Melissa Major BS<sup>1</sup>, Adam M. Smiles MS<sup>1</sup>, and Andrzej S. Krolewski MD, PhD<sup>1,2</sup>

**Supplementary Table 1A.** Summary of TGF- $\beta$ 1-regulated miRNAs Detected ( $C_q \leq 30.0$ ) in Plasma from Normoalbuminuric Controls that were Not Selected for Examination in Rapid Progressors and Non-Progressors.

| miRNA        | Cq    |
|--------------|-------|
| let-7b-3p    | 28.66 |
| miR-29b-3p   | 26.19 |
| miR-29b-1-5p | 29.52 |
| miR-200a-5p  | 29.44 |
| miR-200c-3p  | 29.95 |
| miR-377-3p   | 29.33 |
| miR-382-5p   | 27.20 |
| miR-192-5p   | 27.37 |
| miR-491-5p   | 29.78 |

SUPPLEMENTARY DATA

**Supplementary Table 1B.** Summary of TGF- $\beta$ 1-regulated miRNAs Not Highly Detectable (Cq > 30.0) in Plasma from Normoalbuminuric T1D Control Patients.

| miRNA        | Cq     |
|--------------|--------|
| miR-21-3p    | 30.13  |
| miR-29a-5p   | 32.63  |
| miR-29b-2-5p | 33.96  |
| miR-29c-5p   | 30.31  |
| miR-141-3p   | 31.84  |
| miR-141-5p   | 33.88  |
| miR-192-3p   | 31.21  |
| miR-200a-3p  | 32.35  |
| miR-200b-3p  | 31.09  |
| miR-200b-5p  | 30.46  |
| miR-200c-5p  | 32.70  |
| miR-215-5p   | 32.05  |
| miR-216a-5p  | 33.75  |
| miR-216b-5p  | 33.25  |
| miR-217      | 31.78  |
| miR-296-5p   | 30.97  |
| miR-298      | 33.23  |
| miR-377-5p   | 31.42  |
| miR-382-3p   | >35.00 |
